# Supplementary material for: Transplanted human fecal microbiota enhanced Guillain Barré syndrome autoantibody responses after Campylobacter jejuni infection in C57BL/6 mice
Source: PubMed Central journal article supplement (PMC5547673; doi:10.1186/s40168-017-0284-4), 2017-08-08
Supplement: 40168_2017_284_MOESM2_ESM.pdf [file 40168_2017_284_MOESM2_ESM.pdf]

Table S1

| PC | Eigenvalue | % variance | cumulative  |            | Loadings  | Axis 1    | Axis 2   | Axis 3   | Axis 4 |
|----|------------|------------|-------------|------------|-----------|-----------|----------|----------|--------|
|    |            |            | % variance  | % variance |           |           |          |          |        |
| 1  | 1.94E+06   | 62.851     | 62.851      | Otu001     | -0.2182   | -0.8801   | 0.2965   | 0.1682   |        |
| 2  | 826530     | 26.76      | 89.611      | Otu002     | 0.706     | 0.1061    | 0.6459   | 0.02955  |        |
| 3  | 127212     | 4.1187     | 93.7297     | Otu003     | -0.6125   | 0.3932    | 0.5477   | 0.158    |        |
| 4  | 55634.1    | 1.8013     | 95.531      | Otu004     | 0.01291   | 0.02193   | 0.002615 | -0.03965 |        |
| 5  | 30221.9    | 0.97849    | 96.50949    | Otu005     | 0.06274   | -0.03756  | -0.1443  | -0.01264 |        |
| 6  | 21630.2    | 0.70032    | 97.20981    | Otu006     | -0.1501   | 0.1762    | -0.04845 | -0.08714 |        |
| 7  | 18795.2    | 0.60853    | 97.81834    | Otu007     | 0.0673    | -0.02801  | -0.0813  | -0.0107  |        |
| 8  | 16583.8    | 0.53693    | 98.35527    | Otu008     | -0.1116   | 0.05497   | 0.09157  | 0.02544  |        |
| 9  | 11358.6    | 0.36776    | 98.72303    | Otu009     | -0.00615  | -0.00233  | -0.09456 | -0.03379 |        |
| 10 | 7004.58    | 0.22679    | 98.94982    | Otu010     | 0.02819   | -0.00446  | -0.0382  | 0.03239  |        |
| 11 | 6379.05    | 0.20653    | 99.15635    | Otu011     | 0.1294    | 0.1127    | -0.2546  | 0.8871   |        |
| 12 | 5644.54    | 0.18275    | 99.3391     | Otu012     | 0.07659   | 0.01339   | 0.004896 | -0.08691 |        |
| 13 | 5286.03    | 0.17115    | 99.51025    | Otu013     | -0.06895  | 0.06937   | -0.0118  | -0.03991 |        |
| 14 | 3213.42    | 0.10404    | 99.61429    | Otu014     | 0.01091   | -0.0029   | 0.01926  | -0.01026 |        |
| 15 | 2542.71    | 0.082325   | 99.696615   | Otu015     | 0.004843  | 0.01695   | -0.02093 | 0.02365  |        |
| 16 | 1972.54    | 0.063865   | 99.76048    | Otu016     | -0.02603  | -0.01537  | 0.02613  | -0.00365 |        |
| 17 | 1326.41    | 0.042945   | 99.803425   | Otu017     | -0.00166  | -0.00312  | -0.1796  | -0.2537  |        |
| 18 | 1147.25    | 0.037144   | 99.840569   | Otu018     | -0.02324  | 0.0312    | -0.00296 | 0.01637  |        |
| 19 | 851.783    | 0.027578   | 99.868147   | Otu019     | -0.0122   | 0.01178   | 0.007099 | 0.000479 |        |
| 20 | 821.662    | 0.026603   | 99.89475    | Otu020     | -0.00715  | 0.005757  | 0.005393 | -0.00108 |        |
| 21 | 714.81     | 0.023143   | 99.917893   | Otu021     | 0.000594  | 0.001608  | -0.00678 | -0.00192 |        |
| 22 | 531.086    | 0.017195   | 99.935088   | Otu022     | 0.001861  | 0.000195  | 0.000169 | -0.00165 |        |
| 23 | 399.055    | 0.01292    | 99.948008   | Otu023     | 0.02089   | 0.004615  | -0.07937 | -0.09514 |        |
| 24 | 313.592    | 0.010153   | 99.958161   | Otu024     | 0.000379  | -0.01701  | -0.00596 | 0.005465 |        |
| 25 | 253.457    | 0.0082061  | 99.9663671  | Otu025     | -0.00572  | 0.008306  | -0.00841 | -0.0058  |        |
| 26 | 235.21     | 0.0076154  | 99.9739825  | Otu026     | 0.02676   | 0.02092   | -0.122   | 0.06369  |        |
| 27 | 174.885    | 0.0056622  | 99.9796447  | Otu027     | 0.004766  | 0.000971  | -0.01679 | 0.01258  |        |
| 28 | 159.849    | 0.0051754  | 99.9848201  | Otu028     | 0.00056   | -0.00132  | -0.02285 | -0.03172 |        |
| 29 | 118.175    | 0.0038261  | 99.9886462  | Otu029     | 0.001761  | 0.000487  | 0.001905 | -0.00521 |        |
| 30 | 96.3741    | 0.0031203  | 99.9917665  | Otu030     | 0.03391   | 0.00089   | -0.02664 | -0.00729 |        |
| 31 | 42.9081    | 0.0013892  | 99.9931557  | Otu031     | -8.32E-05 | -0.00169  | -0.05683 | -0.08048 |        |
| 32 | 36.1385    | 0.0011701  | 99.9943258  | Otu032     | 0.01342   | -0.02532  | -0.04394 | -0.00301 |        |
| 33 | 29.7293    | 0.00096254 | 99.99528834 | Otu033     | 0.000225  | 0.000351  | -0.00078 | -0.00163 |        |
| 34 | 23.693     | 0.00076711 | 99.99605545 | Otu034     | -0.00086  | -0.00097  | -0.07109 | -0.09847 |        |
| 35 | 21.9022    | 0.00070913 | 99.99676458 | Otu035     | -0.00674  | -0.00626  | -0.03671 | -0.07077 |        |
| 36 | 18.3659    | 0.00059463 | 99.99735921 | Otu036     | -0.00031  | -0.0009   | -0.02673 | -0.03871 |        |
| 37 | 15.2968    | 0.00049526 | 99.99785447 | Otu037     | -0.00654  | 0.007456  | -0.00175 | -0.00241 |        |
| 38 | 13.6742    | 0.00044273 | 99.9982972  | Otu038     | -0.00231  | -0.00177  | 0.00194  | -0.00159 |        |
| 39 | 6.90225    | 0.00022347 | 99.99852067 | Otu039     | 0.019     | -0.04003  | -0.07648 | 0.005851 |        |
| 40 | 5.5542     | 0.00017983 | 99.9987005  | Otu040     | 0.04777   | 0.0138    | 0.03961  | -0.1656  |        |
| 41 | 4.07813    | 0.00013204 | 99.99883254 | Otu041     | 0.000857  | 0.000242  | 0.000796 | 0.001377 |        |
| 42 | 3.36897    | 0.00010908 | 99.99894162 | Otu042     | -0.00343  | 0.00489   | -0.01004 | 0.000698 |        |
| 43 | 2.59045    | 8.39E-05   | 99.99902549 | Otu043     | -8.14E-05 | -3.01E-06 | -0.00283 | -0.00401 |        |
| 44 | 2.19957    | 7.12E-05   | 99.99909671 | Otu044     | -0.00013  | 0.00053   | -0.00279 | -0.00184 |        |
| 45 | 1.66254    | 5.38E-05   | 99.99915053 | Otu045     | -6.77E-05 | -0.00063  | -0.02233 | -0.03157 |        |
| 46 | 1.35688    | 4.39E-05   | 99.99919447 | Otu046     | 0.000675  | 9.55E-05  | -0.00075 | -0.00167 |        |
| 47 | 1.14992    | 3.72E-05   | 99.9992317  | Otu047     | 0.0019    | -0.00322  | -0.0095  | 0.001473 |        |
| 48 | 0.881844   | 2.86E-05   | 99.99926025 | Otu048     | 0.000154  | 3.54E-05  | -0.00059 | -0.00107 |        |
| 49 | 0.681398   | 2.21E-05   | 99.99928231 | Otu049     | -0.00891  | 0.000638  | 0.01921  | 0.008613 |        |
| 50 | 0.562397   | 1.82E-05   | 99.99930052 | Otu050     | 0.001456  | 0.000223  | -0.00026 | -0.00119 |        |
| 51 | 0.424325   | 1.37E-05   | 99.99931426 | Otu051     | 0.002058  | -0.00233  | -0.00192 | 0.004534 |        |

**Table S1 Continued**

| PC | Eigenvalue | % variance | cumulative  |            | Loadings  | Axis 1    | Axis 2    | Axis 3    | Axis 4 |
|----|------------|------------|-------------|------------|-----------|-----------|-----------|-----------|--------|
|    |            |            | % variance  | % variance |           |           |           |           |        |
| 52 | 0.326128   | 1.06E-05   | 99.99932482 | Otu052     | -9.62E-06 | -0.0005   | -0.01709  | -0.02434  |        |
| 53 | 0.291016   | 9.42E-06   | 99.99933424 | Otu053     | 0.001549  | -0.00197  | -0.00542  | -0.00329  |        |
| 54 | 0.211521   | 6.85E-06   | 99.99934109 | Otu054     | -0.00022  | -0.00036  | -0.02071  | -0.0301   |        |
| 55 | 0.139693   | 4.52E-06   | 99.99934561 | Otu055     | -2.17E-05 | -0.00036  | -0.01284  | -0.01825  |        |
| 56 | 0.120737   | 3.91E-06   | 99.99934952 | Otu056     | -0.0044   | -0.00153  | 0.005415  | 0.005099  |        |
| 57 | 0.0998211  | 3.23E-06   | 99.99935275 | Otu057     | -0.00027  | 0.000196  | 0.000116  | -0.00043  |        |
| 58 | 0.0692759  | 2.24E-06   | 99.99935499 | Otu058     | -0.0001   | 3.14E-05  | 0.000138  | -4.03E-05 |        |
| 59 | 0.0578644  | 1.87E-06   | 99.99935687 | Otu059     | -0.00182  | 0.00427   | -0.03201  | -0.02662  |        |
| 60 | 0.0369007  | 1.19E-06   | 99.99935806 | Otu060     | 0.000363  | -0.0012   | -0.00081  | -0.00042  |        |
|    |            |            |             | Otu061     | -2.91E-05 | -0.00044  | -0.01801  | -0.02557  |        |
|    |            |            |             | Otu062     | -0.00012  | -0.00037  | -0.01384  | -0.02001  |        |
|    |            |            |             | Otu063     | -0.00059  | 0.000793  | 0.000125  | -0.0016   |        |
|    |            |            |             | Otu064     | -7.34E-05 | 9.96E-05  | -0.00013  | 0.000132  |        |
|    |            |            |             | Otu065     | -0.00045  | 0.000614  | -0.00207  | -0.00289  |        |
|    |            |            |             | Otu066     | -3.88E-07 | -4.23E-06 | -0.00017  | -0.00025  |        |
|    |            |            |             | Otu067     | -1.59E-05 | -1.43E-05 | -7.18E-05 | -0.00015  |        |
|    |            |            |             | Otu068     | -3.14E-05 | -0.00085  | -0.0352   | -0.05115  |        |
|    |            |            |             | Otu069     | 1.65E-05  | -1.55E-05 | -8.00E-05 | 4.78E-06  |        |
|    |            |            |             | Otu070     | 6.05E-05  | 2.19E-05  | 7.63E-05  | 0.000164  |        |
|    |            |            |             | Otu071     | -2.16E-05 | 3.76E-05  | -4.14E-05 | 6.33E-05  |        |
|    |            |            |             | Otu072     | 2.06E-06  | 1.91E-05  | -0.00013  | -0.00029  |        |
|    |            |            |             | Otu073     | 0.000486  | -0.00084  | -0.00185  | 0.001664  |        |
|    |            |            |             | Otu074     | -0.00041  | 0.000506  | -0.00482  | -0.00567  |        |
|    |            |            |             | Otu075     | 0.000224  | -0.00114  | -0.00312  | 0.00151   |        |
|    |            |            |             | Otu076     | -8.37E-06 | 1.94E-05  | -6.48E-05 | -2.64E-07 |        |
|    |            |            |             | Otu077     | 5.08E-06  | -6.42E-05 | -0.0008   | -0.00107  |        |
|    |            |            |             | Otu078     | -8.29E-05 | 6.40E-05  | 0.000166  | 4.18E-05  |        |
|    |            |            |             | Otu079     | -0.00023  | 0.000266  | -5.38E-05 | -2.53E-05 |        |
|    |            |            |             | Otu080     | -1.26E-05 | -0.0002   | -0.00721  | -0.01024  |        |
|    |            |            |             | Otu081     | 7.85E-05  | 5.98E-05  | -6.69E-05 | 0.000856  |        |
|    |            |            |             | Otu082     | -1.94E-06 | -2.12E-05 | -0.00087  | -0.00125  |        |
|    |            |            |             | Otu083     | 0.00038   | -0.00069  | -0.00064  | 0.001104  |        |
|    |            |            |             | Otu084     | -2.33E-06 | -2.54E-05 | -0.00105  | -0.00149  |        |
|    |            |            |             | Otu085     | 6.89E-05  | -0.00026  | -0.00094  | 0.000539  |        |
|    |            |            |             | Otu086     | 5.22E-05  | 1.35E-05  | -0.00064  | -0.00019  |        |
|    |            |            |             | Otu087     | -7.67E-05 | -4.89E-05 | 9.77E-05  | -9.33E-05 |        |
|    |            |            |             | Otu088     | -2.33E-06 | -2.54E-05 | -0.00105  | -0.00149  |        |
|    |            |            |             | Otu089     | -3.99E-07 | 1.21E-05  | -9.02E-06 | 0.00013   |        |
|    |            |            |             | Otu090     | -3.08E-06 | -4.43E-05 | -5.68E-05 | 1.66E-05  |        |
|    |            |            |             | Otu091     | 6.77E-05  | -0.00022  | -0.00072  | 0.000823  |        |
|    |            |            |             | Otu092     | 0.000142  | -0.00011  | -0.00043  | 0.000149  |        |
|    |            |            |             | Otu094     | -3.88E-07 | -4.23E-06 | -0.00017  | -0.00025  |        |
|    |            |            |             | Otu095     | 9.30E-05  | 3.07E-05  | -0.00031  | 0.000696  |        |
|    |            |            |             | Otu096     | 4.10E-05  | -7.49E-05 | -5.83E-06 | 0.000221  |        |
|    |            |            |             | Otu097     | -1.16E-05 | 1.88E-05  | -0.00018  | -0.00019  |        |
|    |            |            |             | Otu098     | 1.30E-05  | 5.04E-06  | -1.33E-05 | -2.08E-06 |        |
|    |            |            |             | Otu100     | -1.11E-05 | 1.25E-05  | -0.00019  | -0.00034  |        |
|    |            |            |             | Otu101     | -1.13E-05 | -7.86E-06 | 1.99E-05  | -1.99E-05 |        |
|    |            |            |             | Otu103     | 1.44E-05  | -8.52E-08 | 4.18E-05  | -0.00012  |        |
|    |            |            |             | Otu104     | 1.27E-05  | 2.06E-06  | -4.00E-06 | 1.29E-05  |        |
|    |            |            |             | Otu105     | 6.74E-06  | 2.98E-05  | -6.71E-05 | 0.000157  |        |
|    |            |            |             | Otu106     | 2.08E-06  | -2.50E-05 | -6.27E-05 | 1.93E-05  |        |

Table S1 continued

| PC     | Eigenvalue | % variance | cumulative<br>% variance | Loadings | Axis 1    | Axis 2    | Axis 3    | Axis 4    |
|--------|------------|------------|--------------------------|----------|-----------|-----------|-----------|-----------|
| Otu107 | 6.10E-05   |            |                          |          | 6.10E-05  | 1.08E-05  | -9.04E-05 | 0.00027   |
| Otu108 | -3.88E-07  |            |                          |          | -3.88E-07 | -4.23E-06 | -0.00017  | -0.00025  |
| Otu109 | 3.67E-05   |            |                          |          | 3.67E-05  | 1.97E-05  | -0.00013  | 0.00017   |
| Otu112 | -1.11E-05  |            |                          |          | -1.11E-05 | 3.25E-06  | 1.80E-06  | -5.05E-05 |
| Otu113 | 1.59E-05   |            |                          |          | 1.59E-05  | -3.21E-05 | 1.13E-05  | -1.37E-05 |
| Otu114 | -3.88E-07  |            |                          |          | -3.88E-07 | -4.23E-06 | -0.00017  | -0.00025  |
| Otu116 | 1.12E-05   |            |                          |          | 1.12E-05  | -5.42E-06 | -0.0002   | -0.00012  |
| Otu117 | 1.04E-05   |            |                          |          | 1.04E-05  | 3.45E-06  | -6.79E-05 | 8.37E-05  |
| Otu118 | 7.85E-05   |            |                          |          | 7.85E-05  | 5.98E-05  | -6.69E-05 | 0.000856  |
| Otu119 | 9.43E-05   |            |                          |          | 9.43E-05  | 7.17E-05  | -8.02E-05 | 0.001027  |
| Otu121 | 3.14E-05   |            |                          |          | 3.14E-05  | 2.39E-05  | -2.67E-05 | 0.000342  |
| Otu123 | 2.93E-06   |            |                          |          | 2.93E-06  | -2.79E-05 | -0.00022  | -0.00029  |
| Otu124 | -3.88E-07  |            |                          |          | -3.88E-07 | -4.23E-06 | -0.00017  | -0.00025  |
| Otu125 | 5.32E-06   |            |                          |          | 5.32E-06  | -7.31E-05 | 2.23E-05  | -2.92E-05 |
| Otu126 | -3.88E-07  |            |                          |          | -3.88E-07 | -4.23E-06 | -0.00017  | -0.00025  |
| Otu127 | 3.14E-05   |            |                          |          | 3.14E-05  | 2.39E-05  | -2.67E-05 | 0.000342  |
| Otu130 | -3.88E-07  |            |                          |          | -3.88E-07 | -4.23E-06 | -0.00017  | -0.00025  |
| Otu132 | 5.85E-06   |            |                          |          | 5.85E-06  | -5.57E-05 | -0.00045  | -0.00057  |
| Otu135 | -8.37E-06  |            |                          |          | -8.37E-06 | 1.94E-05  | -6.48E-05 | -2.64E-07 |
| Otu139 | 1.15E-05   |            |                          |          | 1.15E-05  | -1.19E-06 | -2.13E-05 | 0.000128  |
| Otu140 | 3.33E-05   |            |                          |          | 3.33E-05  | -6.87E-05 | 8.04E-05  | -5.15E-05 |
| Otu144 | -3.51E-06  |            |                          |          | -3.51E-06 | -9.87E-05 | 8.54E-05  | -3.83E-05 |
| Otu149 | 5.06E-05   |            |                          |          | 5.06E-05  | 1.72E-05  | -8.62E-05 | 0.000226  |
| Otu164 | 2.54E-05   |            |                          |          | 2.54E-05  | 4.12E-06  | -8.00E-06 | 2.58E-05  |
| Otu178 | 1.08E-05   |            |                          |          | 1.08E-05  | -4.94E-07 | -3.72E-05 | 9.57E-05  |
