# Supplementary material for: Transplanted human fecal microbiota enhanced Guillain Barré syndrome autoantibody responses after Campylobacter jejuni infection in C57BL/6 mice
Source: PubMed Central journal article supplement (PMC5547673; doi:10.1186/s40168-017-0284-4), 2017-08-08
Supplement: 40168_2017_284_MOESM3_ESM.pdf [file 40168_2017_284_MOESM3_ESM.pdf]

**Table S2 - Indicator groups identified by mothur**

|                                     | <b>Phylum</b>         | <b>Class</b>                 | <b>Order</b>              | <b>Family</b>              | <b>Genus</b>            | <b>P value</b> |
|-------------------------------------|-----------------------|------------------------------|---------------------------|----------------------------|-------------------------|----------------|
| <b>Conventional microbiota mice</b> |                       |                              |                           |                            |                         |                |
| Otu002                              | <i>Bacteroidetes</i>  | <i>Bacteroidia</i>           | <i>Bacteroidales</i>      | <i>Porphyromonadaceae</i>  | unclassified            | 0.024          |
| Otu005                              | <i>Firmicutes</i>     | <i>Clostridia</i>            | <i>Clostridiales</i>      | unclassified               | unclassified            | 0.048          |
| Otu012                              | <i>Firmicutes</i>     | <i>Bacilli</i>               | <i>Lactobacillales</i>    | <i>Lactobacillaceae</i>    | <i>Lactobacillus</i>    | 0.008          |
| Otu022                              | <i>Firmicutes</i>     | <i>Bacilli</i>               | <i>Lactobacillales</i>    | unclassified               | unclassified            | <0.001000      |
| Otu029                              | <i>Firmicutes</i>     | <i>Bacilli</i>               | <i>Lactobacillales</i>    | <i>Lactobacillaceae</i>    | unclassified            | 0.016          |
| Otu032                              | <i>Firmicutes</i>     | <i>Clostridia</i>            | unclassified              | unclassified               | unclassified            | 0.024          |
| Otu039                              | <i>Tenericutes</i>    | <i>Mollicutes</i>            | <i>Anaeroplasmatales</i>  | <i>Anaeroplasmataceae</i>  | <i>Anaeroplasma</i>     | 0.032          |
| Otu040                              | <i>Firmicutes</i>     | <i>Erysipelotrichia</i>      | <i>Erysipelotrichales</i> | <i>Erysipelotrichaceae</i> | <i>Allobaculum</i>      | 0.032          |
| Otu041                              | <i>Firmicutes</i>     | <i>Bacilli</i>               | unclassified              | unclassified               | unclassified            | <0.001000      |
| Otu047                              | <i>Firmicutes</i>     | <i>Clostridia</i>            | <i>Clostridiales</i>      | <i>Lachnospiraceae</i>     | <i>Clostridium_XIVb</i> | 0.024          |
| <b>Humanized microbiota mice</b>    |                       |                              |                           |                            |                         |                |
| Otu003                              | <i>Bacteroidetes</i>  | <i>Bacteroidia</i>           | <i>Bacteroidales</i>      | <i>Bacteroidaceae</i>      | <i>Bacteroides</i>      | 0.032          |
| Otu008                              | <i>Bacteroidetes</i>  | <i>Bacteroidia</i>           | <i>Bacteroidales</i>      | <i>Porphyromonadaceae</i>  | <i>Parabacteroides</i>  | 0.048          |
| Otu013                              | <i>Bacteroidetes</i>  | <i>Bacteroidia</i>           | <i>Bacteroidales</i>      | <i>Rikenellaceae</i>       | <i>Alistipes</i>        | 0.048          |
| Otu019                              | <i>Proteobacteria</i> | <i>Betaproteobacteria</i>    | <i>Burkholderiales</i>    | <i>Sutterellaceae</i>      | <i>Sutterella</i>       | 0.016          |
| Otu025                              | <i>Proteobacteria</i> | <i>Betaproteobacteria</i>    | unclassified              | unclassified               | unclassified            | 0.032          |
| Otu049                              | <i>Proteobacteria</i> | <i>Epsilonproteobacteria</i> | <i>Campylobacteriales</i> | <i>Campylobacteraceae</i>  | <i>Campylobacter</i>    | 0.04           |
| Otu079                              | <i>Proteobacteria</i> | <i>Betaproteobacteria</i>    | <i>Burkholderiales</i>    | <i>Oxalobacteraceae</i>    | unclassified            | 0.008          |
